# Supplementary material for: Magnetic ZnFe2O4@chitosan encapsulated in graphene oxide for adsorptive removal of organic dye
Source: Royal Society of Chemistry journal article supplement (doi:10.1039/c7ra04100d), 2017-01-01
Supplement: c7ra04100d1.pdf [file c7ra04100d1.pdf]

**Magnetic ZnFe<sub>2</sub>O<sub>4</sub>@chitosan encapsulated in graphene oxide  
for adsorptive removal of organic dye**

Xi-Lin Wu, Peiyuan Xiao, Shuxian Zhong, Keming Fang, Hongjun Lin, Jianrong

Chen \*

College of Geography and Environmental Science, College of Chemistry and Life  
Science, Zhejiang Normal University, Jinhua, 321004, China

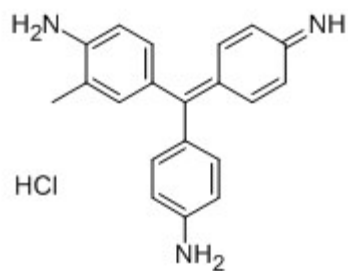

**Fig.S1.** Chemical structure of the Fuchsin basic (BF).

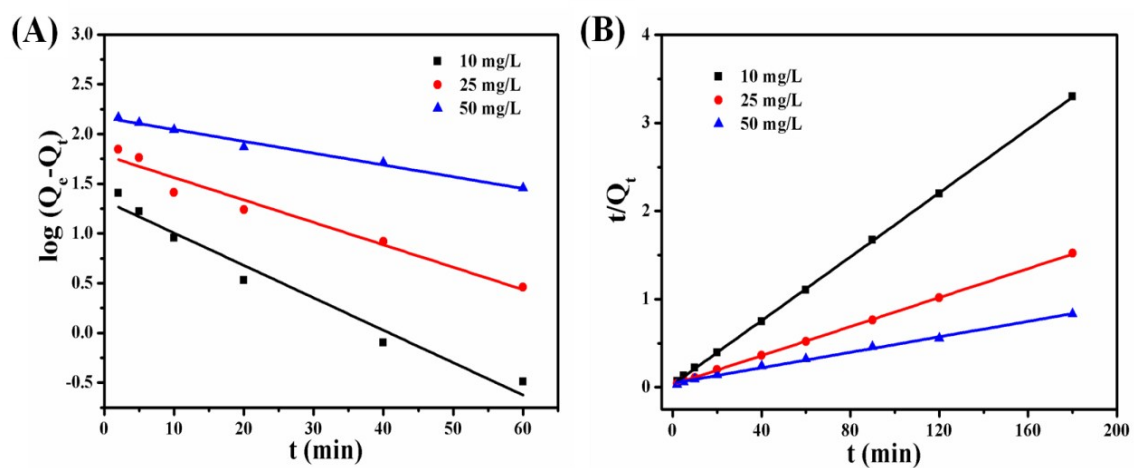

**Fig.S2.** Pseudo-first-order kinetic (A) and pseudo-second-order kinetic (B) plots for the adsorption of BF (pH 9, temperature: 303 K).

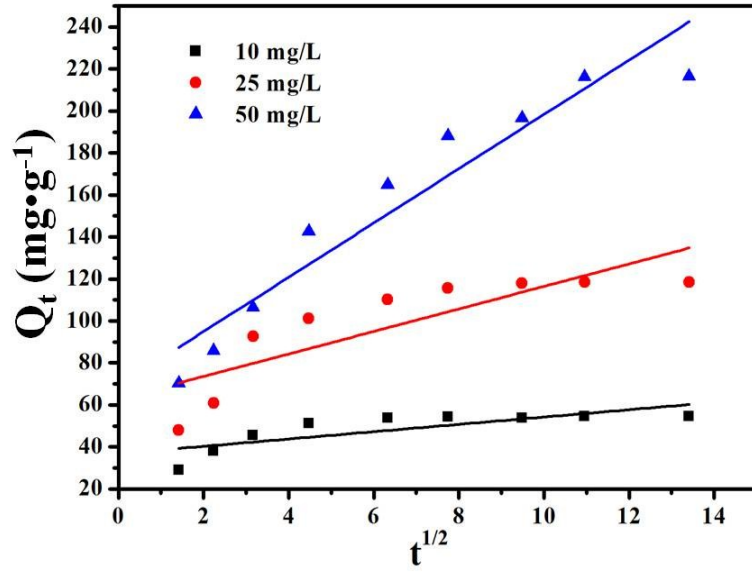

**Fig.S3.** Intraparticle diffusion model plots for the adsorption of BF (pH 9, temperature: 303 K).

**Table S1** Adsorption kinetic parameters of BF onto ZnFe<sub>2</sub>O<sub>4</sub>@CS/GO.

| Initial conc.<br>C <sub>0</sub> (mg·L <sup>-1</sup> ) | Pseudo-first-order                  |                                             |                | Pseudo-second-order                                       |                                             |                                             | R <sup>2</sup> |
|-------------------------------------------------------|-------------------------------------|---------------------------------------------|----------------|-----------------------------------------------------------|---------------------------------------------|---------------------------------------------|----------------|
|                                                       | K <sub>1</sub> (min <sup>-1</sup> ) | Q <sub>e,cal</sub><br>(mg·g <sup>-1</sup> ) | R <sup>2</sup> | K <sub>2</sub><br>(g·mg <sup>-1</sup> min <sup>-1</sup> ) | Q <sub>e,cal</sub><br>(mg·g <sup>-1</sup> ) | Q <sub>e,exp</sub><br>(mg·g <sup>-1</sup> ) |                |
| 10                                                    | 0.033                               | 3.79                                        | 0.9644         | 0.011                                                     | 55.19                                       | 54.56                                       | 0.9999         |
| 25                                                    | 0.023                               | 5.98                                        | 0.9524         | 0.0023                                                    | 121.36                                      | 118.25                                      | 0.9998         |
| 50                                                    | 0.012                               | 8.71                                        | 0.9840         | 0.00042                                                   | 227.79                                      | 216.52                                      | 0.9961         |
